# Supplementary material for: Performance of reanalysis and mesoscale models for wind resource assessment off the coast of Hawaii
Source: Copernicus journal article supplement (doi:10.5194/wes-2025-167), 2025-09-23
Supplement: Supplementary file [file wes-2025-167-AC1-supplement.pdf]

This is a well written and important paper that evaluates the statistics of near-surface wind at an offshore site off Hawaii relative to lidar buoy measurement of the vertical wind profile. Given the sparsity of offshore wind observations, this is an important study, even though it is constrained to just a single observation site. Moreover, the location sits in the unique, persistent tradewind environment, so is remarkably undisturbed by topographic or other continental features. I do however think that there are a number of aspects of the meteorology of the region that have been overlooked, and addressing them would add to the usefulness of this paper. These aspects are described below, followed by a series of minor comments.

Thank you very much for the time and effort you put in to read our paper and suggest improvements. We are grateful for all the ideas you contributed and have addressed them throughout the manuscript as follows. Again, thank you!

## 1. Interannual variability

Given the position of Hawaii in the central Pacific Ocean and the fact that most of the study is based on a single year of data, it seems remiss to ignore the interannual variability. 2023 was an El Nino year, and was reported to have high rainfall across the pacific (eg <https://www.drought.gov/sites/default/files/2023-06/Pacific%20Spring%202023.pdf>). Moreover, there is a strong influence of ENSO on the strength and extent of the tradewinds. This means that when comparing the 2023 dataset to the 2000-2019 and 2008-2017 NOW-23 and GWA3 datasets, there will be a particular bias resulting from the number cases of each ENSO phase. I understand that the dataset of 2023 observations and the high-resolution WRF simulation are limited, but I think some analysis of the impact of the interannual variability on this site would be helpful in establishing whether 2023 was a ‘unusual’ year. This could be done using the ERA5 dataset over a longer time period. A further suggestion would be to try restricting the 2000-2019 and 2008-2017 datasets to just the El Nino years, to give a more realistic base for comparing the 2023 data to.

We really appreciate this great idea and feel that adding the interannual context at your recommendation has improved the analysis significantly. Per your suggestion, we analyzed the most recent 40 years of ERA5 wind, precipitation, and temperature data, along with the Oceanic Niño Index, to set the stage for what kind of year 2023 was at the location of the lidar buoy deployment.

We now begin Section 3 as follows. Lines 180-189: “Prior to comparing the O’ahu observations, which predominantly occur in the year 2023, with atmospheric datasets, it is imperative to provide context on what kind of meteorological year 2023 is relative to the long-term interannual wind speed variability noted at the deployment location. Utilising annual averages of the Oceanic Niño Index (ONI), we find that 2023 is categorized as an El Niño year based on the Climate Prediction Center’s threshold of  $\pm 0.5^{\circ}\text{C}$  (Figure 3a) (NOAA, 2025). In Figure 3b, we explore the annual average ERA5 100 m wind speeds (CDS, 2025b) between 1985 and 2024 and determine that 2022 and 2023 are tied for having the lowest annual average wind speeds over the 40-year period (annual average wind speeds normalized by the 40-year mean for both years = 0.88) while being opposingly classified as La Niña and El Niño years, respectively (Figure 3a). According to ERA5, precipitation and 2 m temperature are above average at the buoy location for the year 2023 (Figure 3c, d). The above average precipitation, temperature, and weakening of the trade winds are consistent with expected El Niño characteristics (Lu et al., 2020).”

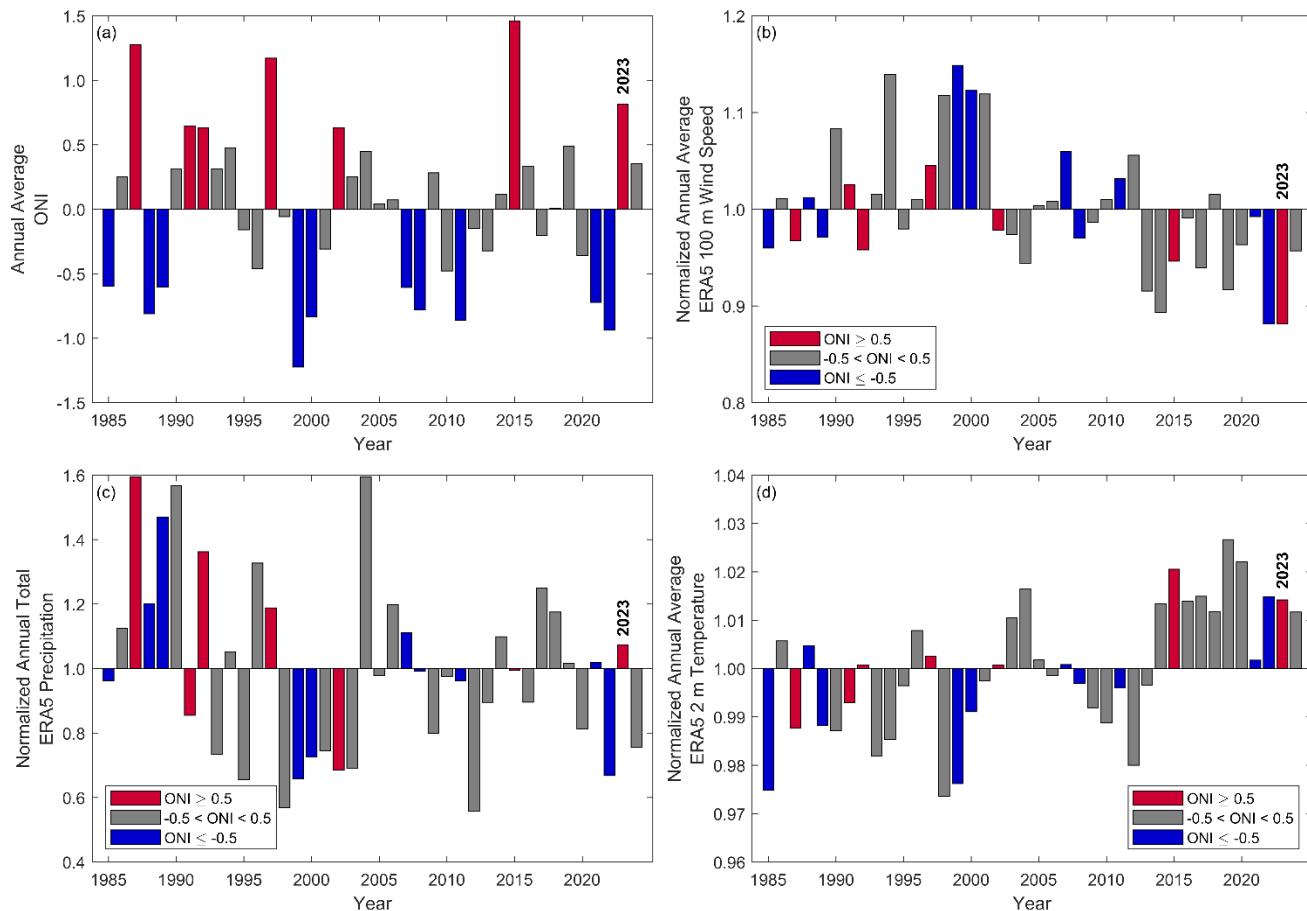

**Figure 3.** (a) Annual average ONI, (b) normalized annual average 100 m wind speed from ERA5, (c) normalized annual total precipitation from ERA5, and (d) normalized annual average 2 m temperature from ERA5 over the 40-year period between 1985 and 2024 coloured by the annual average ONI. The annual average wind speeds are normalized by the 40-year average wind speed at the O’ahu buoy deployment location.

This analysis, which we appreciate you suggesting and encouraging, guided our decision that given the atypical wind resource year that 2023 was, we could not appropriately analyze the non-concurrent datasets NOW-23 and GWA3. Leading up to such a decision, we took your helpful suggestion to assess the ERA5 during 2023 relative to the coverage periods of NOW-23 (2000-2019) and GWA3 (2008-2017).

As can be seen in Figure 3b, the low annual average wind speeds during 2023 are not replicated by any other year that falls within the NOW-23 or GWA3 coverage period, which means we cannot make any statements concerning the performance of these datasets using the 2023 lidar buoy observations. We make mention of this on Lines 190-194: “The following analyses focus on the performance of two simulation datasets that have concurrent temporal coverage with the 2023 observations: ERA5 and UH-WRF. Given the context of 2023 being a record low wind resource year east of O’ahu according to the ERA5 record, it is important to note the need for long-term, continuously updating datasets like reanalyses. Purpose-built wind datasets, like NOW-23 (2000-2019) and Global Wind Atlas (2008-2017), provide numerous years for wind resource assessment but would not represent the characteristics of an atypical year like 2023.”

Lu, B-Y., Chu, P-S., Kim, S-H., and Karamperidou, C.: *Hawaiian Regional Climate Variability during Two Types of El Niño*, *Journal of Climate*, 33, 22, 9929-9943, <https://doi.org/10.1175/JCLI-D-19-0985.1>, 2020.

NOAA (National Oceanic and Atmospheric Administration): *Climate Variability: Oceanic Niño Index*, <https://www.climate.gov/news-features/understanding-climate/climate-variability-oceanic-nino-index>, last updated 25 June 2025.

## 2. Extreme wind influences on the annual cycle

In addition to the systematic interannual variability signal, there are likely some extreme events that contributed to the variability of the 2023 dataset. For example, there were two Kona low events reported in February 2023, which may go a long way to explaining the spike in wind speeds seen in figure 5. Eg see

<https://www.weather.gov/hfo/KonaLowFeb2023> and the associated MSLP map for 17 Feb 2023 (below). This is actually quite a fascinating situation, and assessing whether the reanalysis products were able to accurately capture the strong wind associated with these events is an important diagnostic in itself. It doesn't really make sense to talk about the "steep observed monthly wind increase of 5.66 m/s between January and February 2023" (line 268) as a statistical feature when there was a distinct and unusual weather event causing this difference. Similarly, it doesn't make sense to compare the 2023 monthly averages with the GWA3 and NOW-23 datasets over different time periods, when what we're seeing is less a systematic difference and more the influence of a single weather event. Some relevant points that could be address here are: How unusual were the 2023 February Kona wind events, relative to the time periods in the other datasets? How do the datasets compare if you restrict the analysis to days that just had a 'classic' tradewind regime? <https://weather.uwyo.edu/cgi-bin/uamap?REGION=npac&OUTPUT=gif&TYPE=obs&TYPE=an&LEVEL=1000&date=2023-02-17&hour=0>

We thank you for this suggestion to investigate extreme wind influences and have addressed your helpful recommendation as follows:

First, we added a new section that covers three wind events (Section 3.7 Extreme weather events), including the Kona lows that you pointed out. We found that the wind speeds at the lidar buoy location were weaker during the Kona low periods, with no extreme wind events, and stronger during the typical trade wind occurrences during the month of February 2023. Lines 406-423:

### **"3.7.1 February 2023 Kona lows**

Two consecutive Kona lows (Morrison and Businger, 2001) developed near the Hawaiian Islands in mid-February 2023, resulting in heavy rainfall impacts on several islands (NOAA, 2023a). The buoy observations during this period confirm the disruption of the easterly trade winds, with wind directions becoming more variable and wind speeds weakening (Longman et al., 2021). No extreme wind events are recorded by the buoy during the Kona low events; rather, the wind speeds are elevated during the trade wind dominant periods before and after the events (Figure 15a).

While both simulation datasets capture the decrease in wind speed (Figure 15a) and shift in wind direction from the dominant easterly pattern (Figure 15b), they struggle with representing the temporal variations in the wind speeds during the Kona low events. ERA5 and UH-WRF produce notably lower correlations during the low events between 15-19 February (0.63 and 0.46) relative to the entire deployment (0.89 and 0.85). The ERA5 wind speed biases at 140 m are smaller during the Kona low events relative to the entire deployment ( $-1.34 \text{ m s}^{-1}$  versus  $-1.54 \text{ m s}^{-1}$ ), while UH-WRF overestimates the observed wind speeds during the events at a greater magnitude than the model underestimates the observed wind speeds during the entire deployment ( $0.46 \text{ m s}^{-1}$  versus  $-0.25 \text{ m s}^{-1}$ ). Following the Kona low on 19 February, ERA5 simulates lower wind speeds for an extended period (19-25 February) compared to the observations. This could be attributed to several factors, including challenges in data assimilation after the Kona event, residual atmospheric instabilities delaying boundary layer recovery, misinterpretation of sea surface temperatures and moisture fluxes, or limitations in model physics and parameterizations. Further analysis will be addressed in upcoming work."

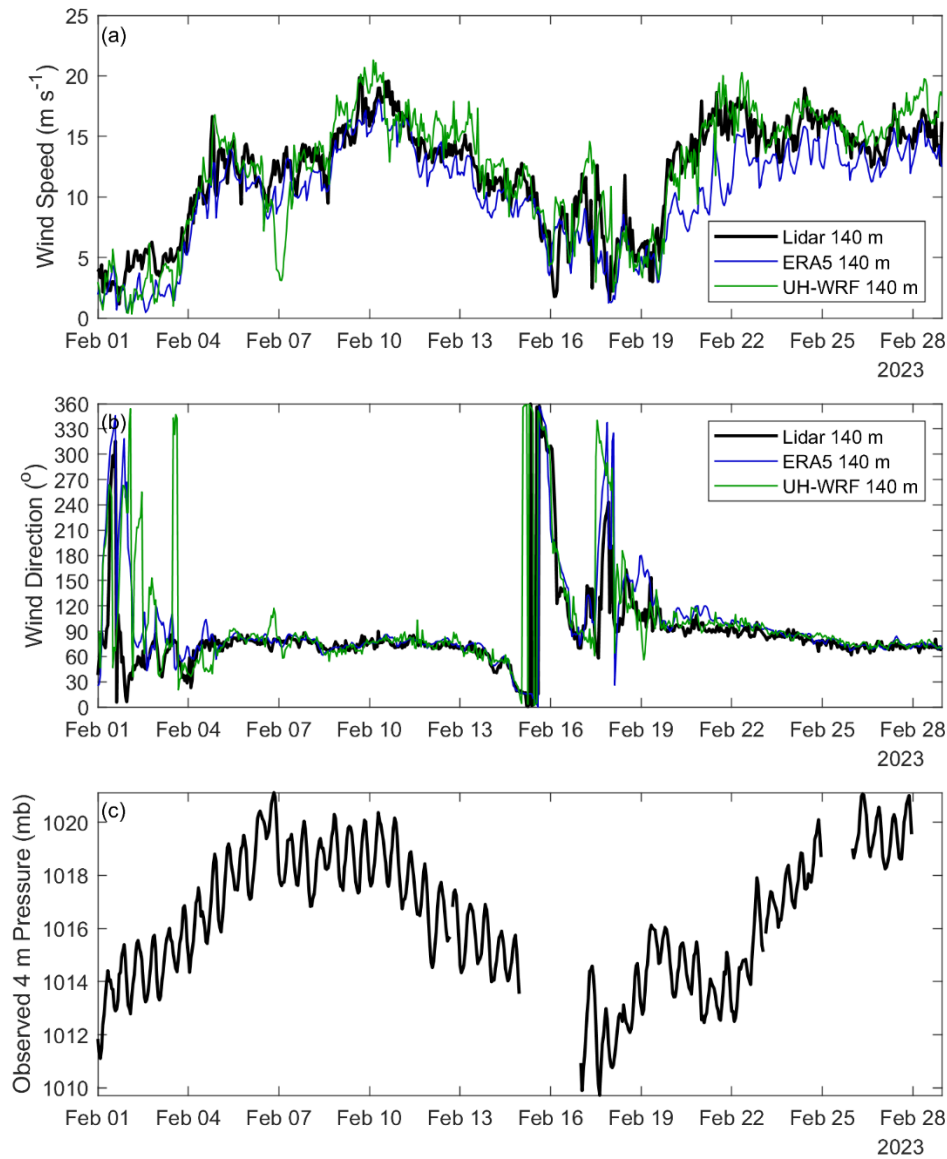

**Figure 15.** Observed and modelled (a) wind speeds and (b) wind directions and (c) observed 4 m air pressure at the lidar buoy location during February 2023.

Next, we took your recommendation to examine the long-term ERA5 dataset in terms of the seasonal cycle. We found that the unique pattern of the monthly average wind speeds in 2023 relative to 40 years of ERA5 wind speeds mirrors the pattern of the frequency of occurrence of the trade winds in 2023 relative to the same 40 years.

Lines 231-249: “The seasonal wind cycle during the lidar buoy deployment is characterized by immense variability in the fall and winter and more static conditions in the spring and summer (Figure 6). The observed monthly 140 m wind speed standard deviation is  $2.31 \text{ m s}^{-1}$  for fall and winter months (September – February) and  $0.79 \text{ m s}^{-1}$  for spring and summer months (March – August). Especially notable is the steep observed monthly 140 m wind speed increase of  $5.66 \text{ m s}^{-1}$  between January and February 2023 (Figure 6a); however, it is important to explore the 2023 seasonal patterns in the context of the long-term patterns. Looking at the monthly wind speeds normalized by the annual average wind speed from the 2023 deployment observations and the simulation datasets, which show similar patterns, in the context of 40 years (1985 to 2024) of normalized monthly 100 m wind speeds from ERA5 (CDS, 2025b), the 2023 seasonal wind speed cycle is atypical relative to the long-term (Figure 6b). While weather events can occur along the eastern shores of O’ahu that alter the typical conditions (Morrison and Businger, 2001) and potentially the temporal wind speed patterns (see Section 3.7), long-term ERA5-based analysis indicates that

the 2023 seasonal wind speed cycle at the buoy location is driven by the prevalence of the trade winds (Figure 6c). We find that faster (slower) monthly average wind speeds in 2023, relative to the long-term trends, follow a pattern of increased (decreased) frequency of occurrence of the trade winds (Figure 6b, c). For example, the average wind speed at the buoy location during February 2023 is the 96th percentile of the averages for all Februaries in the 40-year ERA5 record. The frequency of occurrence of the trade winds (50°-100°) during February 2023 (occurring 72% of the time) corresponds to a high percentile relative to all Februaries in the 40-year ERA5 record: 87th. Similarly, the slowest monthly wind speeds in 2023 relative to their 40-year counterparts (January: 9th percentile, March: 18th percentile, October: 4th percentile) have lower frequencies of trade wind occurrences during 2023 (January: 29th percentile, March: 1st percentile, October: 7th percentile) (Figure 6b, c).”

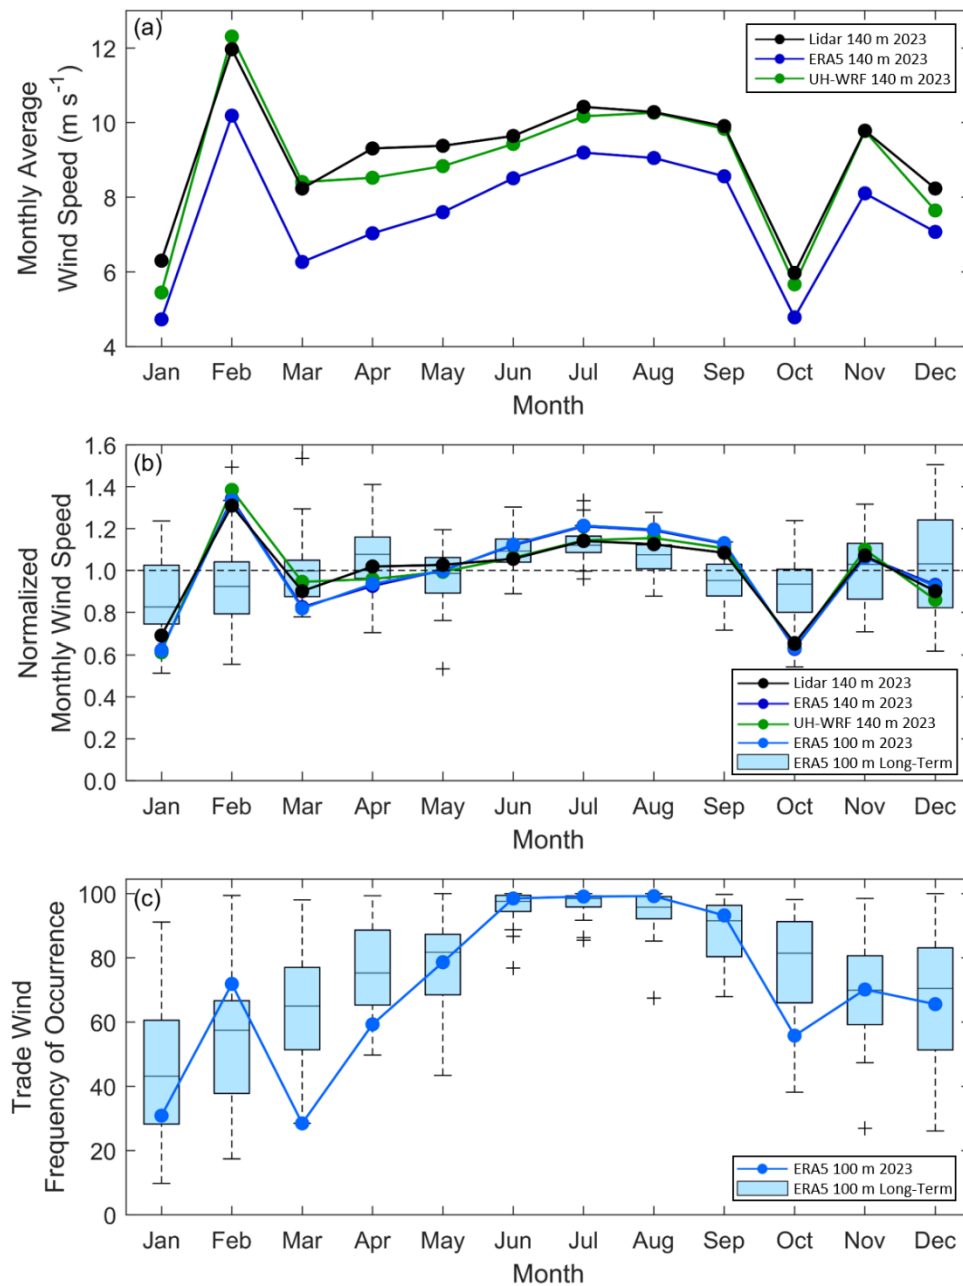

**Figure 6.** (a) Monthly average wind speeds from the Hawaii lidar observations, ERA5, and UH-WRF. (b) Normalized monthly average wind speeds from the Hawaii lidar observations, ERA5, and UH-WRF paired with ERA5 long-term normalized monthly wind speeds, which cover a 40-year period from 1985 to 2024. (c) Frequency of occurrence of winds sourcing between 50° and 100° from ERA5, both long-term and for 2023. Average observed and modelled wind speeds and trade wind frequencies for December reflect only the first half of the month, corresponding to the buoy deployment period.

We truly appreciate the approach you suggested to provide context for the seasonal variations in wind observed in 2023. Similarly, your suggestion provided us with an opportunity to explore the performance of ERA5 and UH-WRF during some interesting weather events and we are grateful for the resultant improvement to the analysis. As with the annual analysis, we concur with your guidance that we cannot perform helpful comparisons between the observations and NOW-23 and Global Wind Atlas given the uniqueness of the year 2023 and the incongruent temporal coverage periods, therefore we have removed discussion of the seasonal cycles of those two datasets.

*CDS (Climate Data Store): ERA5 hourly data on single levels from 1940 to present [data set],*

*<https://cds.climate.copernicus.eu/datasets/reanalysis-era5-single-levels>, accessed 26 November 2025b.*

*Longman, R. J., Elison Timm, O., Giambelluca, T. W., and Kaiser, L.: A 20-Year Analysis of Disturbance-Driven Rainfall on O‘ahu, Hawai‘i, Monthly Weather Review, 149, 6, 1767-1783, <https://doi.org/10.1175/MWR-D-20-0287.1>, 2021.*

*Morrison, I. and Businger, S.: Synoptic Structure and Evolution of a Kona Low, Weather and Forecasting, 16, 81-98, [https://doi.org/10.1175/1520-0434\(2001\)016%3C0081:SSAEOA%3E2.0.CO;2](https://doi.org/10.1175/1520-0434(2001)016%3C0081:SSAEOA%3E2.0.CO;2), 2001.*

### 3. Local aspects

A great strength of this study is the fact that the wind is almost undisturbed tradewind flow. However, there may be some local influences relating to the effects of the islands. This could be especially relevant to the diurnal cycle in figure 13, and potentially particularly in the rare cases when the wind is blowing from the ESE or SSW. The lidar observations have a larger-amplitude diurnal cycle than either of the reanalysis datasets studied, but is this due to the different prevalence of wind directions in the different datasets? I suggest splitting the diurnal cycle up into different wind direction bins, although I know it will be difficult to get statistical significance for the rarer directions. A relevant reference for interaction of local phenomena with the tradewind environment is Dao et al. (2025):

Dao, T.L., Vincent, C.L., Huang, Y., Peatman, S.C., Soderholm, J.S., Birch, C.E., et al. (2025) Joint modulation of coastal rainfall in Northeast Australia by local and large-scale forcings. Quarterly Journal of the Royal Meteorological Society, e70027. Available from: <https://doi.org/10.1002/qj.70027>

Thank you for this important suggestion to explore the local effects of the islands! In both the original and the latest versions of the draft, we identified ERA5 as having the largest-amplitude diurnal cycle and attributed this finding to the discontinuities that appear in ERA5 which are tied to the start of the 12-hour reanalysis assimilation windows.

Lines 266-277: “The observed wind speeds transition smoothly across the diurnal cycle, with a standard deviation of the 140 m hourly average wind speeds of  $0.28 \text{ m s}^{-1}$ . The fastest speeds occur during the evening and at night, while the slowest speeds are observed during the day (Figure 7a, c). The UH-WRF diurnal cycle follows that of the observations, with nearly zero bias occurring for hours between 0 and 11 UTC and underestimation occurring between 12 and 23 UTC (average hourly bias =  $-0.40 \text{ m s}^{-1}$ ) (Figure 7b). Identifying necessary improvements to better characterize diurnal mixing within boundary layer parameterizations is required. Contrary to ERA5’s accurate representation of the observed seasonal wind speed cycle, the reanalysis struggles to capture the observed diurnal cycle in 2023. Trends in the ERA5 wind speeds and associated wind speed biases are tied to the start of the 12-hour reanalysis assimilation windows of 9 and 21 UTC (Hersbach et al., 2020) as shown by the sharp peaks at these hours in Figure 7. Such discontinuities in the ERA5 diurnal wind speed cycle are also noted by Kalverla et al. (2019) over the North Sea. As with the annual and seasonal wind resource, 2023 is an atypical year relative to 40 years of ERA5 diurnal cycles (Figure 7d).”



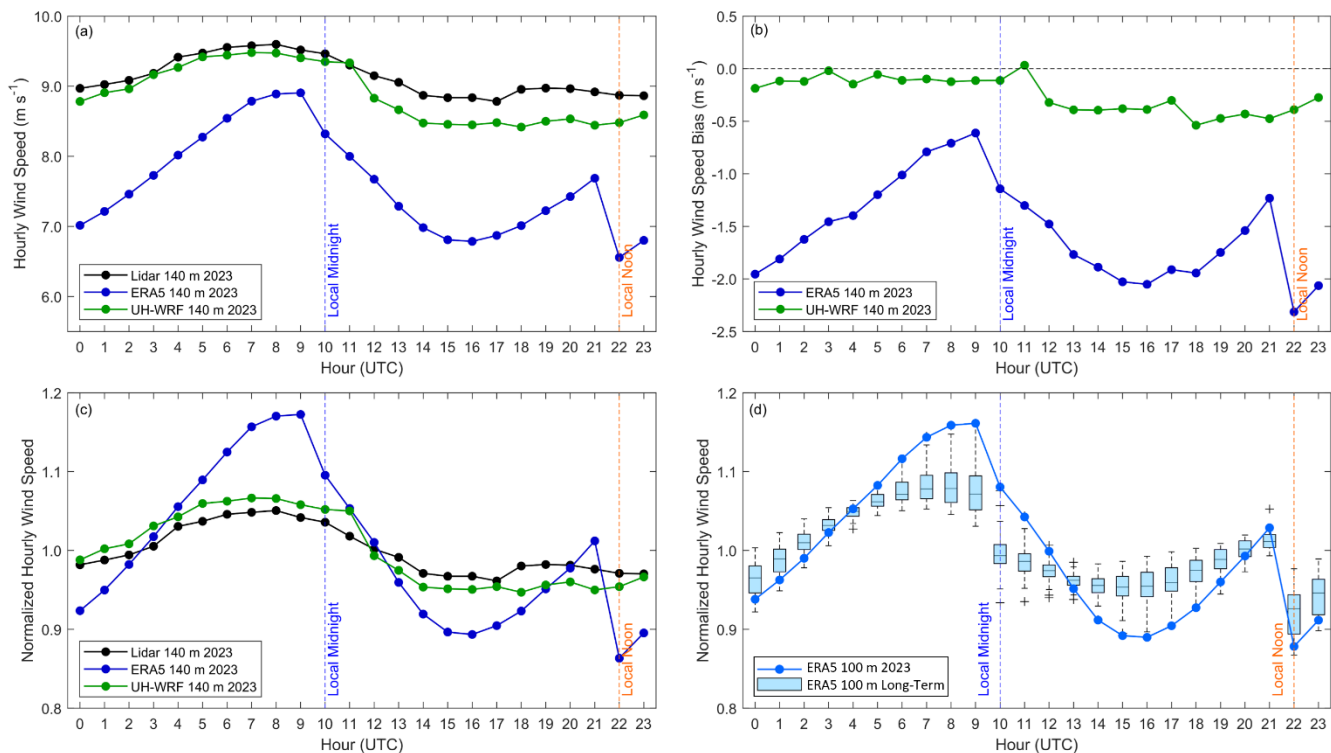

**Figure 7.** (a) Hourly average wind speeds during 2023, (b) hourly wind speed bias during 2023, and (c) normalized hourly average wind speeds during 2023 from the Hawaii lidar observations, ERA5 and UH-WRF. (d) Normalized 2023 and long-term (1985-2024) ERA5 100 m wind speeds at the lidar buoy location.

To address your question on different prevalence of wind directions in the different datasets, we provide Lines 284-293 and Figure 8:

“The wind resource in Hawai’i is dominated by persistent northeast trade winds, with rare occurrences of wind sourcing from the south at O’ahu (Argüeso and Businger, 2018). During the overlapping period of the buoy observations and ERA5 and UH-WRF simulation coverage (1 January 2023 – 15 December 2023), 76% of the observed 140 m wind at the buoy location occur between 50° and 100° (Figure 8a). ERA5 underestimates the observed frequency of winds occurring between 50° and 100° at 70% (Figure 8b), while the percentage of winds occurring between 50° and 100° according to UH-WRF is closer to the observations at 73% (Figure 8c). Winds originating from O’ahu (230°-300°) (Figure 8a) constitute only 1% of the observed 2023 wind climatology at the lidar buoy location, suggesting that the buoy is situated within the wake of O’ahu island. Both ERA5 and UH-WRF slightly overestimate winds originating from the direction of O’ahu at 3% and 2%, respectively. Winds originating from Moloka’i (110°-150°) are slightly more frequent (3%) and ERA5 and UH-WRF similarly overestimate the rate of occurrence of Moloka’i-based winds at 5%.”

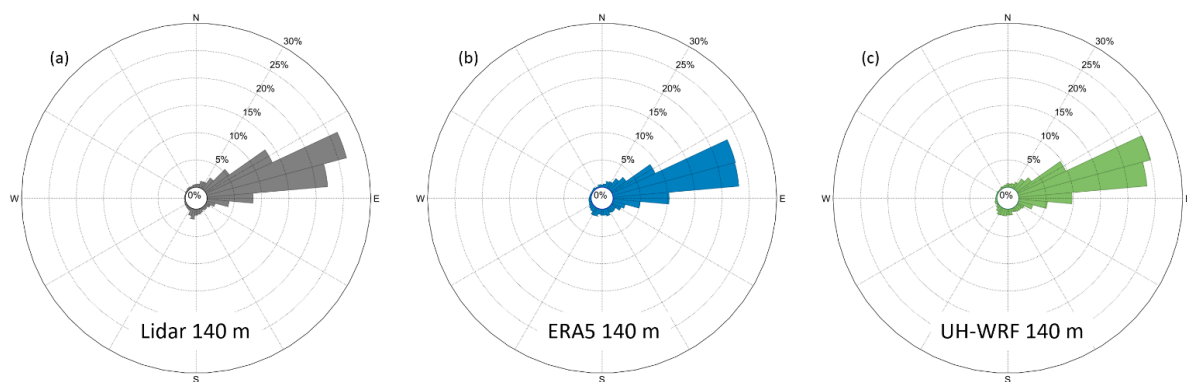

**Figure 8.** Wind direction distributions at 140 m from (a) the O’ahu lidar buoy, (b) ERA5, and (c) UH-WRF between 1 January and 15 December 2023.

We also added an analysis of the dataset performance according to whether the winds were trade winds or less typical directions that could include influences from the islands on Lines 298-306:

“As expected given the trade wind-dominant environment, the median 140 m wind speed biases from ERA5 and UH-WRF are extremely similar whether considering the entire buoy deployment period ( $-1.41 \text{ m s}^{-1}$  for ERA5,  $-0.21 \text{ m s}^{-1}$  for UH-WRF) or just times when the trade winds are observed ( $-1.43 \text{ m s}^{-1}$  for ERA5,  $-0.22 \text{ m s}^{-1}$  for UH-WRF) (Figure 9). While keeping in mind that the sample sizes are significantly smaller when considering island-influenced winds, Figure 9 shows the wind speed biases becoming more positive for winds sourcing from the directions of Moloka’i and O’ahu. For winds originating from Moloka’i, the median ERA5 wind speed bias is  $-1.01 \text{ m s}^{-1}$ , while UH-WRF exhibits a tendency to overestimate the wind speeds with a median bias of  $0.46 \text{ m s}^{-1}$ . In the rare event that winds at the lidar buoy location originated from O’ahu during 2023, the degree of simulation overestimation is notable, particularly when examining UH-WRF (median wind speed bias =  $1.80 \text{ m s}^{-1}$ ).”

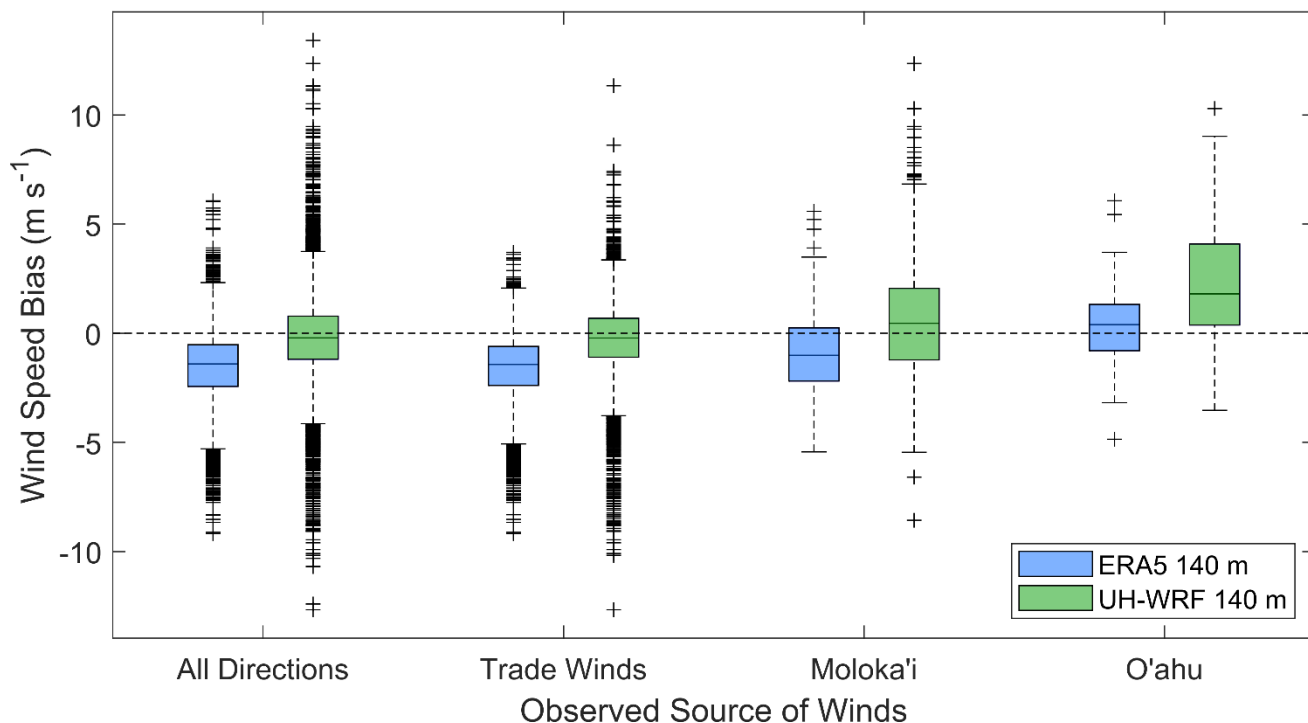

**Figure 9.** ERA5 and UH-WRF wind speed bias according to observed 140 m wind direction. The trade winds are defined as sourcing between  $50^\circ$  and  $100^\circ$ ; Moloka’i-sourced winds are defined between  $110^\circ$  and  $150^\circ$ ; O’ahu winds are defined between  $230^\circ$  and  $300^\circ$ .

Argüeso, D. and Businger, S.: *Wind power characteristics off O’ahu, Hawaii, Renewable Energy*, 128, 324-336, <https://doi.org/10.1016/j.renene.2018.05.080>, 2018.

Hersbach, H. and coauthors: *The ERA5 Global Reanalysis, Q. J. Roy. Meteor. Soc.*, 146, 1999–2049, <https://doi.org/10.1002/qj.3803>, 2020.

Kalverla, P. C., Holtslag, A. A. M., Ronda, R. J., and Steeneveld, G.-J.: *Quality of wind characteristics in recent wind atlases over the North Sea, Quarterly Journal of the Royal Meteorological Society*, 146(728), 1498-1515, <https://doi.org/10.1002/qj.3748>, 2020.

#### 4. Treatment of the short dataset

As already mentioned before, the treatment of the short dataset is not quite convincing. The authors should use the ERA5 dataset to establish the links between the other datasets that all cover different periods: Eg. a plot of the monthly wind averages from ERA5 for the periods 1950-present, 2000-2019, 2008-2018 and 2023 will help tie



everything together, and clarify the representivity of the different time periods. This may indicate some further filtering as mentioned above, such as restricting the analysis to El Nino years.

We completely agree with your guidance regarding the short dataset. As mentioned in the response to Major Comment 1, we incorporated your suggestion to use the long-term ERA5 dataset to establish links between the other datasets. In short summary of our response to Major Comment 1, we found (thanks to your suggestion) that the year 2023 was such a unique wind year at the location of the lidar buoy deployment location that its characteristics would not be represented by any year within the temporal ranges of the nonconcurrent datasets NOW-23 and GWA3. Therefore, we opted to no longer speculate on any kind of performance relative to the 2023 observations for the nonconcurrent datasets.

#### Specific Comments

Lines 57-80. Could this information be presented in a more integrated way? Listing them one by one is difficult to read and doesn't leave any overall impression of the issues. Perhaps group by dataset type: "Several studies have evaluated ERA5 at offshore sites, and noted a low wind speed bias (ref ref). etc". I guess the key message is that there has only been a small number of studies so far, the results are inconsistent across the studies, which is what makes this current study important.

We have truncated and grouped Lines 53-65 as follows per your recommendation for improved readability:

"With the increasing availability (though still a relatively small sample) of offshore rotor level observations, studies have emerged over recent years comparing the performance of multiple simulation datasets at turbine rotor heights in offshore locations with the aims of aiding analysts in selecting the optimal datasets for resource assessments and highlighting areas for accuracy improvement for dataset developers. These studies have shown significant differences in performance across simulations being validated at a single offshore location, and in some cases one simulation product can be the best performer for one error metric (bias, correlation, mean absolute error, etc) and the worst performer for another metric. A variety of wind performance studies have evaluated ERA5 and note that the reanalysis tends to underestimate observed wind speeds (Kalverla et al., 2020 over the North Sea; Sheridan et al., 2020 off the eastern coast of the United States; Pronk et al., 2022 and Fragano and Colle, 2025 off the eastern coast of the United States; Sheridan et al., 2022 off the western coast of the United States). Several offshore studies find that higher-resolution datasets improve upon ERA5 in terms of wind speed bias (Kalverla et al., 2020 examining the Dutch Offshore Wind Atlas; Pronk et al., 2020 examining the Wind Integration National Dataset Toolkit Long-term Ensemble Dataset (WTK-LED); Fragano and Colle, 2025 examining NOW-23) but note that ERA5 outperforms the higher-resolution datasets according to other error metrics or wind field characteristics."

Line 92-92 – Define YSU and MYNN acronyms

The definitions of YSU and MYNN have been added to the specified lines (Lines 78 in the updated draft). We appreciate you pointing out that the definition of these terms later in the text is not helpful to readers of the Introduction.

Line 104 – is metocean actually a word?

We have replaced instances of "metocean" with "meteorological and oceanographic" or "atmospheric and oceanic" throughout the text.

Line 136 – "off of Oahu" -> "off Oahu"

The suggested grammatical edit has been incorporated into the latest draft (Line 537, now located in Appendix A). Thank you!

Figure 2 – Where does the 4 metre observation come from?

The 4 m observation comes from the surface met station that is aboard the buoy in addition to the lidar. Per your question, we have added the following context to Figure 2’s caption to improve clarity and have added a citation to help readers access the publicly available data:

“Measurements at 60 m and higher source from the onboard lidar system (DOE, 2025a) while measurements at 4 m source from the onboard surface meteorological station (DOE, 2025b).”

*DOE (U.S. Department of Energy): 10 min Lidar Winds/Derived Data [data set], <https://wdh.energy.gov/ds/buoy/lidar.z07.c0>, accessed 6 January 2025a.*

*DOE (U.S. Department of Energy): Hawaii - Wind Sentinel (120), Oahu, Hawaii / Reviewed Data [data set], <https://wdh.energy.gov/ds/buoy/buoy.z07.b0>, accessed 6 January 2025b.*

Line 177 – ‘EMCWF’ -> ‘ECMWF’

We have fixed this typo on Line 140 of the updated draft. Many thanks for bringing it to our attention!

Line 191 – Presumably the 1.5 km simulation didn’t use a cumulus parametrisation?

Correct, the cumulative parameterization was run at for the regional domain but not the 1.5-km simulation. We have added clarification to Lines 143-147:

“The key configurations include the WRF Single-Moment 6-class Microphysics scheme for representing the cloud microphysical processes, the Betts-Miller-Janjic cumulus parameterization for convective processes on the regional domain, the Rapid Radiative Transfer Model for Global Circulation Models for longwave and shortwave radiation, the Noah land-surface model, and the YSU planetary boundary layer (PBL) scheme (Hsiao et al., 2020, 2021).”

*Hsiao, F., Chen, Y.-L., and Hitzl, D. E.: Heavy rainfall events over central O’ahu under weak wind conditions during seasonal transitions, Monthly Weather Review, 148, 4117-4141, <https://doi.org/10.1175/MWR-D-19-0358.1>, 2020.*

*Hsiao, F., Chen, Y.-L., Nguyen, H. P., Hitzl, D. E., and Ballard, R.: Effects of Trade Wind Strength on Airflow and Cloudiness over O’ahu, Monthly Weather Review, 149 (9), 3037-3062, <https://doi.org/10.1175/MWR-D-20-0399.1>, 2021.*

Table 1: The GWA3 dataset should mention the microscale downscaling, not just the mesoscale modelling part

We have removed analysis of GWA3 per the response to Major Comment 1. However, in appreciation of the reviewer’s suggestion, we would have added the following to Table 1 for GWA3:

“WAsP IBZ model in the microscale phase”, along with the accompanying text: “From there, microscale modelling using the linear IBZ flow models within the Wind Atlas Analysis and Application Program (WAsP) is used for horizontal and vertical extrapolation of the wind to achieve an output grid spacing of 250 m based on high-resolution orographic and roughness length maps (Davis et al., 2023).”

*Davis, N. N., Badger, J., Hahmann, A. N., Hansen, B. O., Mortensen, N. G., Kelly, M., Larsén, X. G., Olsen, B. T., Floors, R., Lizcano, G., Casso, P., Lacave, O., Bosch, A., Bauwens, I., Knight, O. J., Potter van Loon, A., Fox, R., Parvanyan, T., Krohn Hansen, S. B., Heathfield, D., Onninen, M., and Drummond, R.: The Global Wind Atlas: A High-Resolution Dataset of Climatologies and Associated Web-Based Application, Bulletin of the American Meteorological Society, 104.8, E1507-E1525, <https://doi.org/10.1175/BAMS-D-21-0075.1>, 2023.*

Equations 1-3. Are these standard equations really necessary? Perhaps check with the editors.

We have removed the equations for these commonly employed metrics per your suggestion.

Figure 3: It would be better to make the time period for these plots the same (1 Jan 2023 – 15 December 2023).

We appreciate your helpful suggestion for consistency and have updated the entirety of Section 3 to compare the performance of UH-WRF and ERA5 during the overlapping period when both datasets and the lidar observations are available (1 Jan 2023 – 15 Dec 2023 for hours when all three datasets are represented). Figure 3 and the associated discussion in the text now read (Lines 201-209):

“During the nearly year-long overlapping period of the buoy deployment, UH-WRF, and ERA5 (1 January 2023 – 15 December 2023), ERA5 strongly underestimates the observed wind speeds across the profile with biases ranging from  $-1.52 \text{ m s}^{-1}$  to  $-1.54 \text{ m s}^{-1}$  ( $-1.54 \text{ m s}^{-1}$  at 140 m) (Figure 4). UH-WRF underestimates the observed wind speeds across the profile as well, but to a lesser degree, with biases ranging from  $-0.24 \text{ m s}^{-1}$  to  $-0.29 \text{ m s}^{-1}$  ( $-0.25 \text{ m s}^{-1}$  at 140 m) (Figure 4). The correlations for both ERA5 (0.88-0.89) and UH-WRF (0.84-0.85) suggest successful representation of the hourly fluctuations in the observed wind speeds (Figure 4a). Previous DOE lidar buoy deployments off the northern and central coasts of California revealed similar correlations for ERA5 (0.88) (Sheridan et al., 2022). The CRMSEs during the Hawai‘i buoy deployment (ERA5 =  $1.59\text{-}1.62 \text{ m s}^{-1}$ , UH-WRF =  $1.96\text{-}2.02 \text{ m s}^{-1}$ ) (Figure 4a) are notably lower than the ERA5-based CRMSEs found during the California deployments, which ranged between  $2.3 \text{ m s}^{-1}$  and  $2.4 \text{ m s}^{-1}$ .”

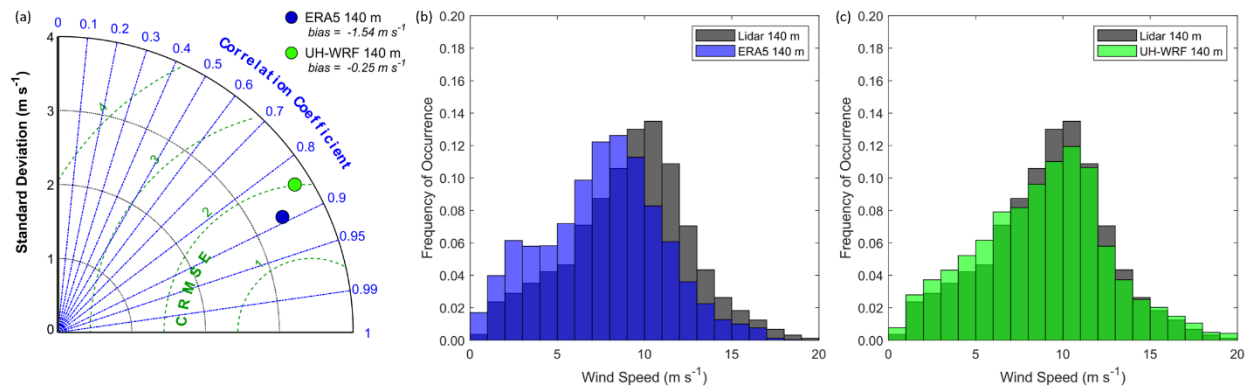

**Figure 4.** ERA5 and UH-WRF wind speed (a) correlations, standard deviations, and CRMSEs, and (b), (c) distributions at the Hawaii buoy location during the overlapping period of 1 January 2023 – 15 December 2023.

Figure 4 and accompanying text: Define that you’re talking about the median bias, not the mean bias.

We ensured that the accompanying text includes the word “median” when discussing the bias throughout Lines 221-227 and added the following clarification to the caption of Figure 5 (previously Figure 4): “For this and all box plots in the manuscript, the line in the centre of the box indicates the median.”

“ERA5 and UH-WRF follow similar patterns in bias according to the observed wind speed (Figure 5). In representing the observed pre-cut-in wind speeds at 140 m, ERA5 exhibits little bias (median =  $0.15 \text{ m s}^{-1}$ ) while UH-WRF significantly overestimates (median bias =  $0.83 \text{ m s}^{-1}$ ). For observed wind speeds on the steep portion of the power curve, ERA5 and UH-WRF underestimate with median biases of  $-1.39 \text{ m s}^{-1}$  and  $-0.25 \text{ m s}^{-1}$ . The greatest ERA5 errors are determined for observed wind speeds corresponding to maximum turbine generation, at the top of the power curve. For these faster observed wind speeds, ERA5 displays significant underestimation, with a median bias of  $-1.74 \text{ m s}^{-1}$ , while UH-WRF produces a median bias of  $-0.30 \text{ m s}^{-1}$ .”

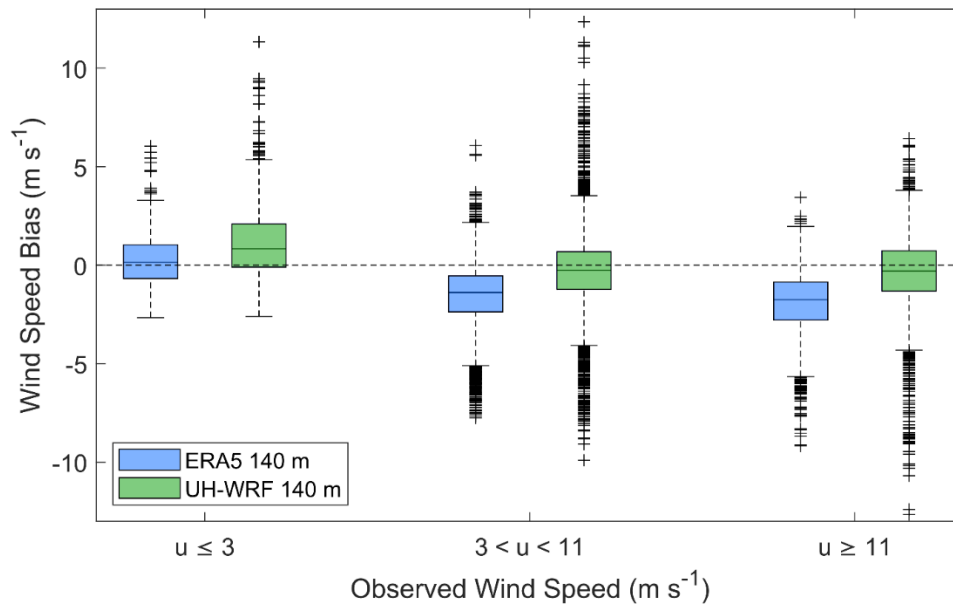

**Figure 5.** ERA5 and UH-WRF wind speed bias according to observed wind speed during the Hawaii buoy deployment. For this and all box plots in the manuscript, the line in the centre of the box indicates the median.

Line 284 – ‘gently’ -> ‘smoothly’

We have swapped these words in the latest draft (Line 267), per your suggestion.

Figure 5 – perhaps a bar chart would be more appropriate, since this is not really continuous data.

With the switch to making the analysis of the 3 comparison datasets (observations, ERA5, and UH-WRF) concurrent (Specific Comment concerning Figure 3, above), the monthly analysis for Figure 5 (now Figure 6) is now continuous:

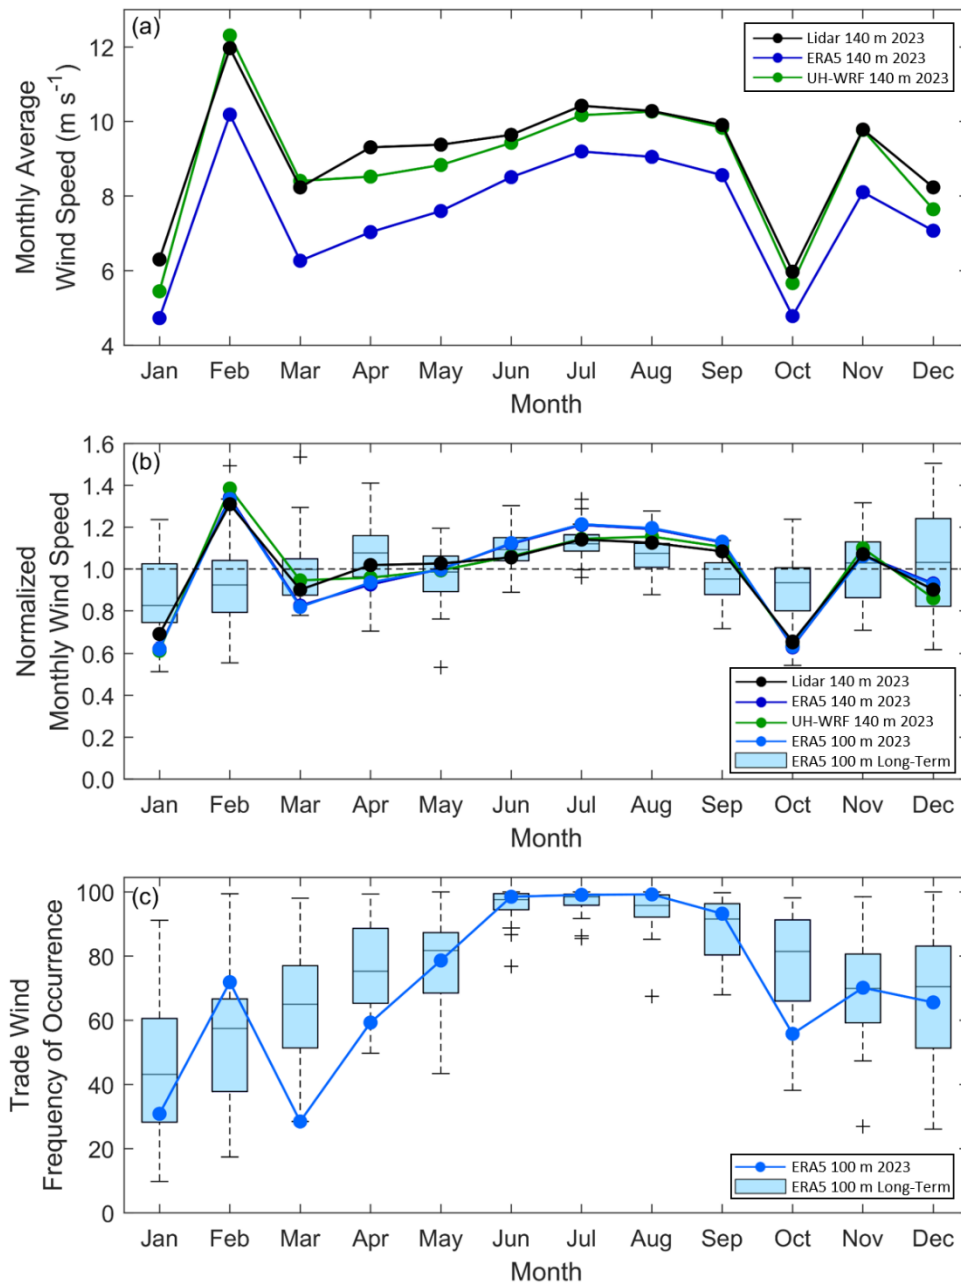

**Figure 6.** (a) Monthly average wind speeds from the Hawaii lidar observations, ERA5, and UH-WRF. (b) Monthly average wind speeds normalized by the annual average wind speed from the Hawaii lidar observations, ERA5, and UH-WRF paired with ERA5 long-term normalized wind speeds, which cover a 40-year period from 1985 to 2024. (c) Frequency of occurrence of winds sourcing between  $50^\circ$  and  $100^\circ$  from ERA5, both long-term and for 2023. Average observed and modelled wind speeds and trade wind frequencies for December reflect only the first half of the month, corresponding to the buoy deployment period.

Line 293. Clarify what these correlations are. Are they between the 24 values of the average diurnal cycle for each dataset?

Thank you for your helpful suggestion for clarity. Yes, the correlations were between the 24 hours of the diurnal cycle for each dataset. Upon review, we opted to remove this type of correlation analysis from the diurnal and seasonal discussions, as we felt that the high degree of correlation for such a small sample size obscured the true performance of the simulation datasets in representing the temporal trends. For example, if we examine the diurnal cycles, both ERA5 and UH-WRF provide correlations  $>0.9$  when comparing with observations. However,

these high correlations obscure the clear challenges that ERA5 has with regard to representing the observed diurnal cycle, as seen in the scatter plots below that we include for the reviewer’s benefit:

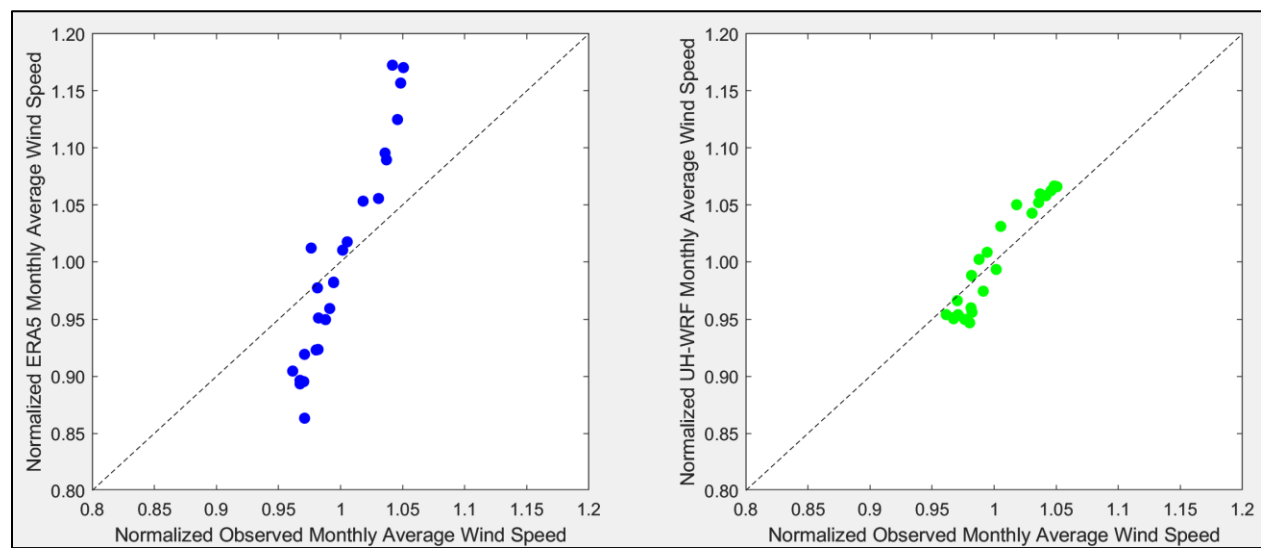

Figure 7 – I think it would be clearer to just show the observed wind rose.

We have simplified the figure (now Figure 8) to show the observed wind rose (Figure 8a) alongside the ERA5 and UH-WRF wind roses (Figure 8b,c):

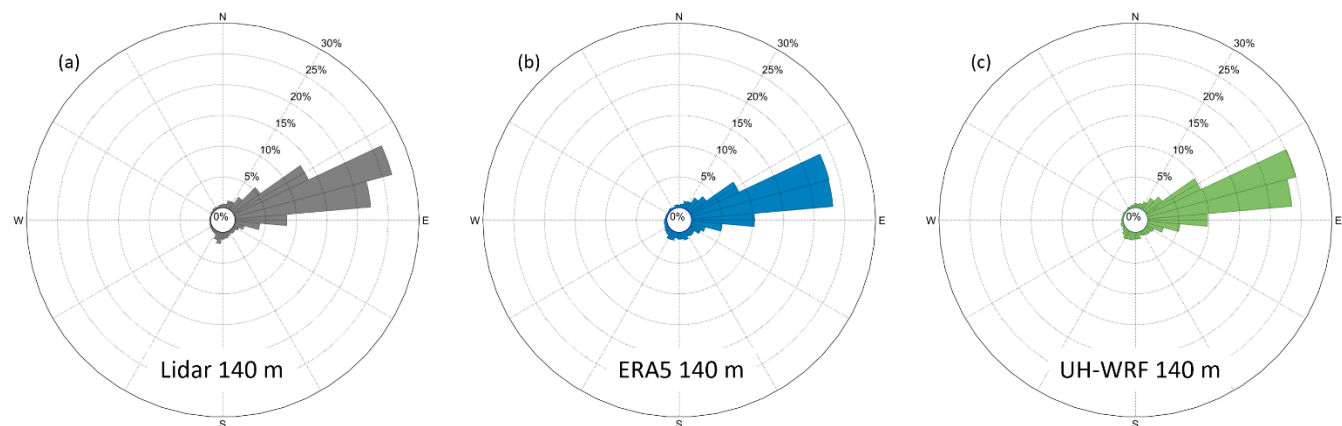

**Figure 8.** Wind direction distributions at 140 m from (a) the O’ahu lidar buoy, (b) ERA5, and (c) UH-WRF between 1 January and 15 December 2023.

Figure 8 – It might be better to calculate the Richardson number or other stability metric, rather than just the airsea temperature difference.

We appreciate the suggestion that the air-sea temperature difference is not the ideal parameter to investigate, especially for a study focused on conditions at the wind turbine rotor level. We considered the relationship between atmospheric stability and the enhancement or suppression of turbulence and have reworked Section 3.3 and Figure 10 to instead analyze the ERA5 and UH-WRF performance according to turbulence intensity using the 1-Hz lidar buoy at a height of 140 m. This approach enables us to perform an observation-based evaluation at turbine hub height in lieu of a non-existent observed temperature profile or a parameterized stability metric such as the Obukhov length developed by, for example, the Coupled Ocean-Atmosphere Response Experiment (COARE) algorithm.



Lines 312-324: “Assessing the degree of turbulence at a location of wind energy development interest is advantageous for establishing generation expectations, particularly in a waked wind farm environment (Hansen et al., 2011). Therefore, it is important to define the baseline performance of datasets used for wind resource assessment according to different turbulent environments. Using the 1-Hz lidar buoy observations from the Hawai’i deployment (DOE, 2025c), we determine turbulence intensity (TI) at turbine hub height using the ratio of the standard deviation to the mean of the 140 m wind speeds over 10-minute periods (DOE, 2025a). At the offshore O’ahu buoy location, TI values below 0.1 occur 32% of the deployment period, while the bulk of the measurements (60%) show that TI during the deployment is between 0.1 and 0.2 (Figure 10a). The sample size of TI values reaching or exceeding 0.2 is small (8% of the deployment period). For hub height wind speeds below 5 m s<sup>-1</sup>, the observed TI at the buoy location follows an inverse relationship with the observed mean 10-minute wind speeds and then hovers around 0.11 for wind speeds faster than 5 m s<sup>-1</sup> (Figure 10b). ERA5 and UH-WRF exhibit trends of increasingly positive wind speed bias with increasing hub height turbulence, with median ERA5 140 m wind speed biases of -1.63 m s<sup>-1</sup>, -1.44 m s<sup>-1</sup>, and -0.18 m s<sup>-1</sup> and median UH-WRF 140 m wind speed biases of -0.48 m s<sup>-1</sup>, -0.16 m s<sup>-1</sup>, and 0.75 m s<sup>-1</sup> for observed 140 m TI less than 0.1, between 0.1 and 0.2, and at least 0.2, respectively (Figure 10c, d).”

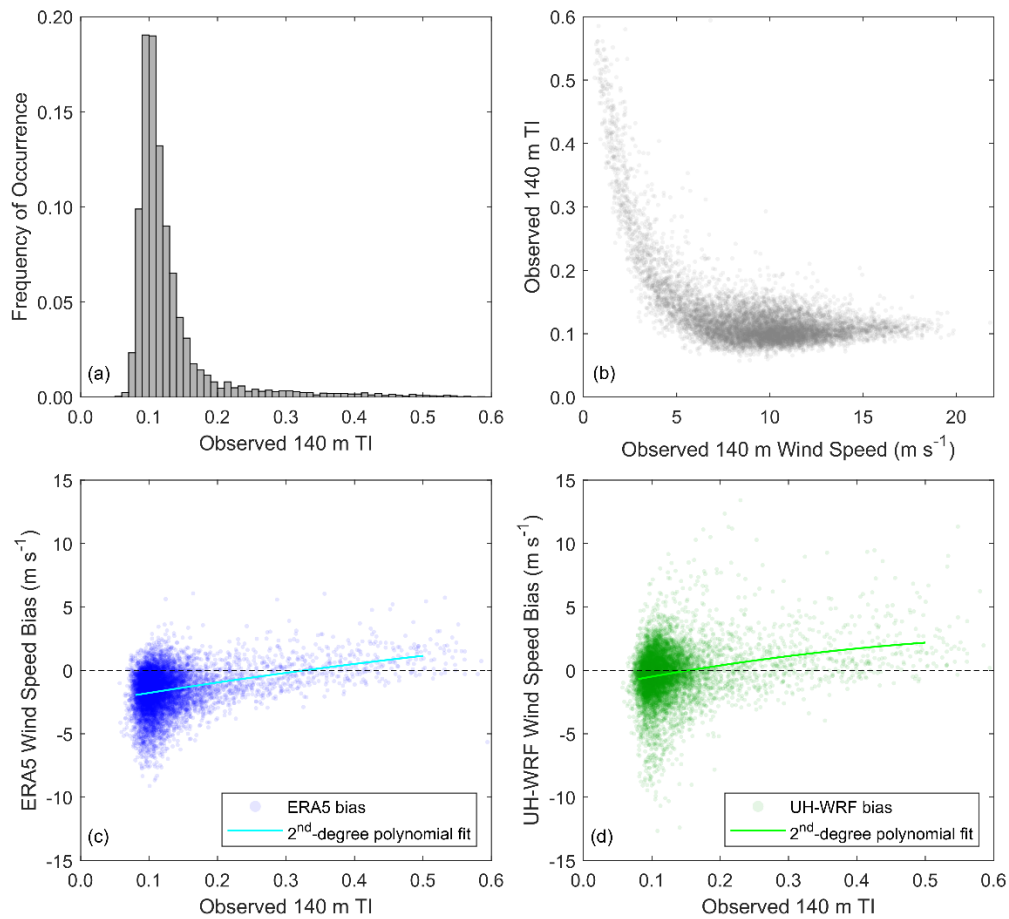

**Figure 10.** (a) Distribution of TI at 140 m during the Hawaii lidar buoy deployment, (b) observed TI according to observed 140 m wind speed, and (c) ERA5 and (d) UH-WRF 140 m wind speed bias according to observed TI.

DOE (U.S. Department of Energy): 10 min Lidar Winds/Derived Data [data set], <https://wdh.energy.gov/ds/buoy/lidar.z07.c0>, accessed 6 January 2025a.

DOE (U.S. Department of Energy): 1Hz Lidar Winds / Reviewed Data [data set], <https://wdh.energy.gov/ds/buoy/lidar.z07.b0>, accessed 24 November 2025c.

Hansen, K. S., Barthelmie, R. J., Jensen, L. E., Sommer, A.: *The impact of turbulence intensity and atmospheric stability on power deficits due to wind turbine wakes at Horns Rev wind farm*, *Wind Energy*, 15(1), 183-196, <https://doi.org/10.1002/we.512>, 2011.

Section 4.1. I'm really not sure that it's reasonable to talk about bias here, given the different time periods. See general comments. Use the same time period for ERA5, NOW23 and GWA3, and then also do it for just 2023 for ERA5.

We agree. Based on your suggestion to assess ERA5 for the NOW-23 and GWA3 time periods relative to 2023 and the long-term, we determined that it was unfeasible to perform any validation for NOW-23 and GWA3 using the 2023 lidar buoy observations off O'ahu. A full discussion of the investigation can be found in the response to your first Major Comment.

Figure 11 – What do the box plots show? Is it all values in the 2000-2019 period, or the distribution of the 20 annual averages during that time?

This figure has been removed from the latest draft to go, along with the analysis of NOW-23 and GWA3. For the reviewer, this figure showed the 20 annual averages from NOW-23 and the 10 annual averages from GWA3. We apologize for not making this clear in the caption.

Figure 13 - Why were the ERA5 and WRF datasets not included in the diurnal cycle study?

We apologize for not including them originally. If we were including NOW-23 and GWA3 in the latest draft, we would add ERA5 and WRF into the figure per your suggestion.
